# Supplementary material
Source: publisher site journal article supplement (https://www.dovepress.com/article/390164)
Supplement: Supplementary file 1 [file get_supplementary_file.php]

Supplementary materials

1. COREQ (Consolidated criteria for Reporting Qualitative research) Checklist

A checklist of items that should be included in reports of qualitative research. You must report the page number in your manuscript where you consider each of the items listed in this checklist. If you have not included this information, either revise your manuscript accordingly before submitting or note N/A.

| **Topic** | **Item No.** | **Guide Questions/Description** | **Reported on**  **Page No.** |
| --- | --- | --- | --- |
| **Domain 1: Research team**  **and reﬂexivity** | | | |
| *Personal characteristics* | | | |
| Interviewer/facilitator | 1 | Which author/s conducted the interview or focus group? | 1 |
| Credentials | 2 | What were the researcher’s credentials? E.g. PhD, MD | 1 & 2 |
| Occupation | 3 | What was their occupation at the time of the study? | 1 & 2 |
| Gender | 4 | Was the researcher male or female? |  |
| 1 & 2 |
| Experience and training | 5 | What experience or training did the researcher have? | 1 & 2 |
| *Relationship with*  *Participants* | | | |
| Relationship established | 6 | Was a relationship established prior to study commencement? | 8 & 9 |
| Participant knowledge of  the interviewer | 7 | What did the participants know about the researcher? e.g. personal  goals, reasons for doing the research |  |
| 8 & 9 |
|  |
| Interviewer characteristics | 8 | What characteristics were reported about the inter viewer/facilitator?  e.g. Bias, assumptions, reasons and interests in the research topic |  |
| 8 & 9 |
|  |
| **Domain 2: Study design** | | | |
| *Theoretical framework* | | | |
| Methodological orientation and Theory | 9 | What methodological orientation was stated to underpin the study? e.g. grounded theory, discourse analysis, ethnography, phenomenology,  content analysis |  |
| 6 |
|  |
| *Participant selection* | | | |
| Sampling | 10 | How were participants selected? e.g. purposive, convenience,  consecutive, snowball |  |
| 7 |
|  |
| Method of approach | 11 | How were participants approached? e.g. face-to-face, telephone, mail,  Email |  |
| 6 & 7 |
|  |
| Sample size | 12 | How many participants were in the study? | 7 & 14 |
| Non-participation | 13 | How many people refused to participate or dropped out? Reasons? | 14 |
| *Setting* | | | |
| Setting of data collection | 14 | Where was the data collected? e.g. home, clinic, workplace | 8 |
| Presence of non-  Participants | 15 | Was anyone else present besides the participants and researchers? |  |
| 9 |
|  |
| Description of sample | 16 | What are the important characteristics of the sample? e.g. demographic  data, date |  |
| 14 |
|  |
| *Data collection* | | | |
| Interview guide | 17 | Were questions, prompts, guides provided by the authors? Was it pilot  tested? | 9 |
|  |
| Repeat interviews | 18 | Were repeat inter views carried out? If yes, how many? | 9 |
| Audio/visual recording | 19 | Did the research use audio or visual recording to collect the data? | 9 |
| Field notes | 20 | Were ﬁeld notes made during and/or after the inter view or focus group? | 9 |
| Duration | 21 | What was the duration of the inter views or focus group? | 9 |
| Data saturation | 22 | Was data saturation discussed? | 9 |
| Transcripts returned | 23 | Were transcripts returned to participants for comment and/or | 9 |

| **Topic** | **Item No.** | **Guide Questions/Description** | **Reported on**  **Page No.** |
| --- | --- | --- | --- |
|  |  | correction? |  |
| **Domain 3: analysis and**  **ﬁndings** | | | |
| *Data analysis* | | | |
| Number of data coders | 24 | How many data coders coded the data? | 9 |
| Description of the coding  Tree | 25 | Did authors provide a description of the coding tree? |  |
| 9 |
|  |
| Derivation of themes | 26 | Were themes identiﬁed in advance or derived from the data? | 10 |
| Software | 27 | What software, if applicable, was used to manage the data? | 10 |
| Participant checking | 28 | Did participants provide feedback on the ﬁndings? | 10 |
| *Reporting* | | | |
| Quotations presented | 29 | Were participant quotations presented to illustrate the themes/ﬁndings?  Was each quotation identiﬁed? e.g. participant number |  |
| 15,16,17 |
|  |
| Data and ﬁndings consistent | 30 | Was there consistency between the data presented and the ﬁndings? | 14 |
| Clarity of major themes | 31 | Were major themes clearly presented in the ﬁndings? | 14 |
| Clarity of minor themes | 32 | Is there a description of diverse cases or discussion of minor themes? | 15-27 |

Developed from: Tong A, Sainsbury P, Craig J. Consolidated criteria for reporting qualitative research (COREQ): a 32-item checklist for interviews and focus groups. *International Journal for Quality in Health Care*. 2007. Volume 19, Number 6: pp. 349 – 357

**Once you have completed this checklist, please save a copy and upload it as part of your submission. DO NOT include this checklist as part of the main manuscript document. It must be uploaded as a separate file.**

## 2. Depth interview Guide questions with physicians

Greetings,

We are conducting a research entitled “Exploring Effective Communication Strategies Employed by Physicians in Delivering Bad News in Ethiopian State Hospitals**”.** You are among the selected respondents to answer questions based on the sampling design procedure. The data you provide is exclusively used for **Academic research purpose.**

- Area of Interviewee: ……………………………….……….
- Sex of Interviewee: Male……………... Female…………….
- Age: ………………
- No. of years in service: ……………...
- Highest level of educational qualification…………………………...
- Date of interview………. /…….../……….

**An in-depth interview guide for physicians on breaking bad news for patients**

1. What are the ways you usually use to exchange information with your patients?
2. What types of approach you are using to explain to your patient’s treatment?
3. What challenges you faced while you are communicating with your patients?
4. How do you *understand* your patients’ questions and responses?
5. What communication strategies that you implement with your patients to deliver bad news?
6. Some patients have grievance that doctors do not tell the truth regarding their condition. What is your explanation?
7. How do you tell the truth to applied about your patient’s condition?
8. What barriers did you encounter when you breaking bad news?
9. What do you do before you deliver bad news?
10. What mechanisms you are used to identify patients’ emotion related to bad news?
11. How do get patients’ permission to share bad news?
12. How do you explain language you use when you deliver bad news?
13. What do you do to minimize the patient's anxiety?
14. Do you have information about SPIKS protocol? How do you implement it?
15. Have you ever attended training related to breaking bad news?
16. What are your current recommendations for providing bad news?
